# Supplementary material
Source: PubMed Central journal article supplement (PMC9904376)
Supplement: EIJ-D-21-00824_Toth_SD.pdf [file EIJ-D-21-00824_Toth_SD.pdf]

Supplementary data

Supplementary Table 1. Procedural and stent characteristics of the clinical cases.

|                                               |                           |                |        |
|-----------------------------------------------|---------------------------|----------------|--------|
| <b>Localisation</b>                           | Left main stem            | 22 (61%)       |        |
|                                               | LAD                       | 13 (36%)       |        |
|                                               | RCA                       | 1 (3%)         |        |
|                                               | LCX                       | 0 (0%)         |        |
| <b>Stent type</b>                             | XIENCE (Abbott)           | 13 (36%)       |        |
|                                               | Resolute Onyx (Medtronic) | 11 (31%)       |        |
|                                               | Ultimaster (Terumo)       | 4 (11%)        |        |
|                                               | SYNERGY (Boston Sc.)      | 3 (8%)         |        |
|                                               | Orsiro (Biotronik)        | 3 (8%)         |        |
|                                               | Other                     | 2 (6%)         |        |
| <b>Stent diameter</b>                         | Nominal diameter          | 3.31±0.34 mm   |        |
|                                               | Post-dilation diameter    | 4.29±0.43 mm   | p<0.01 |
|                                               | Absolute overexpansion    | +0.98±0.36 mm  |        |
|                                               | Overexpansion rate        | +30.29±12.98 % |        |
| <b>Stent length</b>                           | Nominal length            | 26.14±9.03 mm  |        |
|                                               | Final length              | 28.36±9.01 mm  | p<0.01 |
|                                               | Absolute lengthening      | +2.22±1.35 mm  |        |
|                                               | Lengthening rate          | +9.53±7.24 %   |        |
| <b>Elongation per extent of post-dilation</b> | First tertile             | 1.62±0.94 mm   |        |
|                                               | Second tertile            | 2.36±1.15 mm   |        |
|                                               | Third tertile             | 2.49±1.70 mm   | p=0.30 |

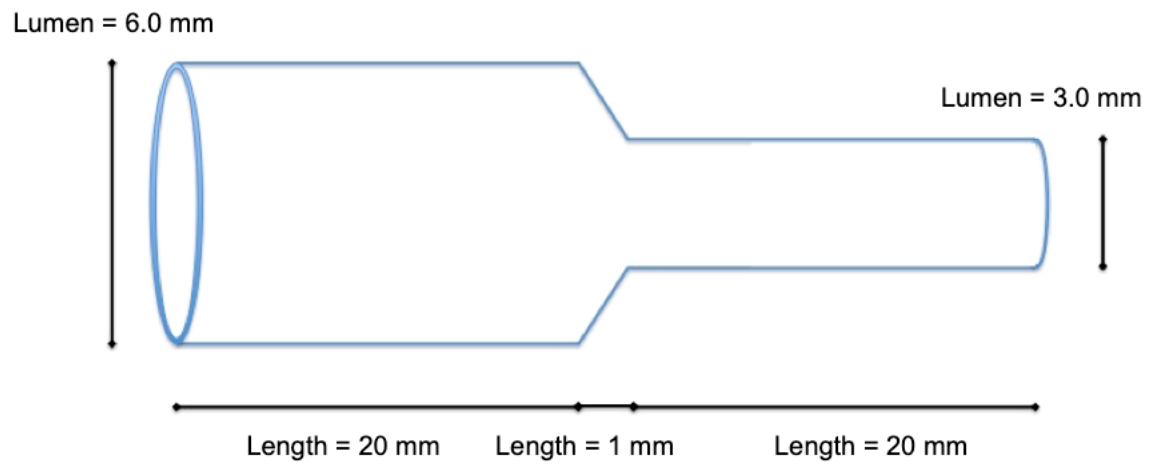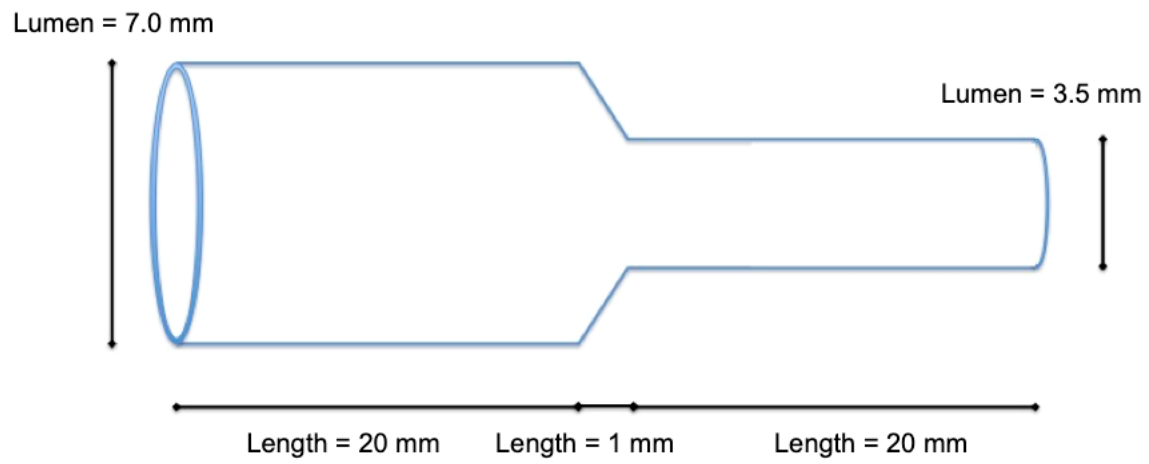

**Supplementary Figure 1.** Parameters of the bench vessel models.

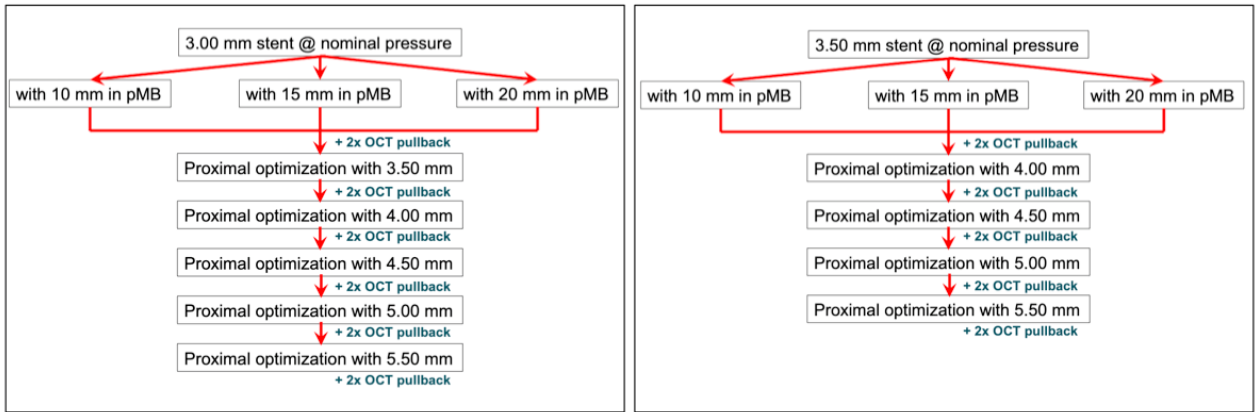

**Supplementary Figure 2.** Steps of the bench testing for the 3.00 mm stent platform (left) and for the 3.50 mm stent platform (right).

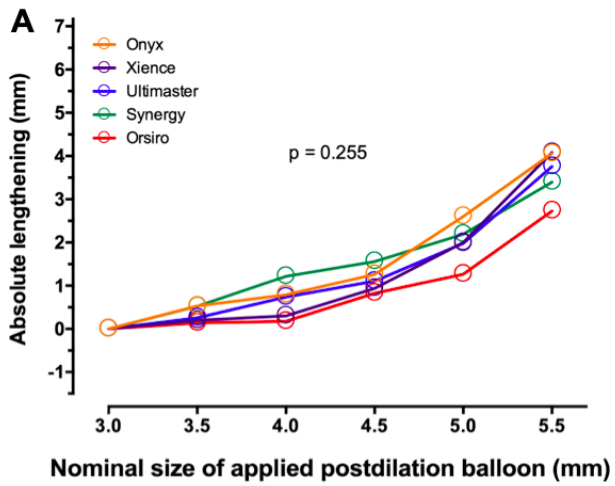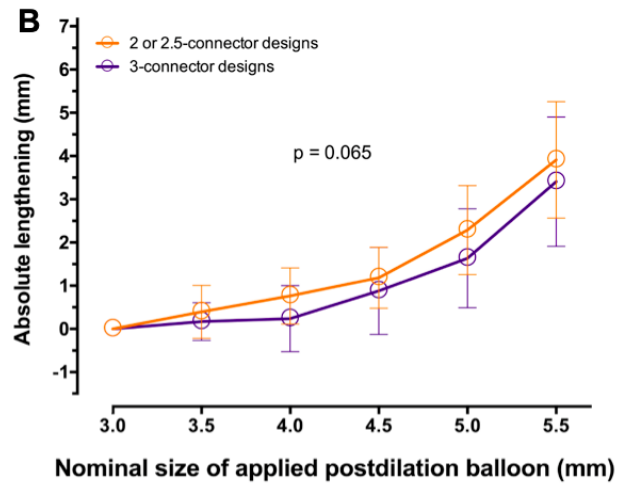

**Supplementary Figure 3.** Lengthening according to different stent types (A) and according to different type of stent designs (B).

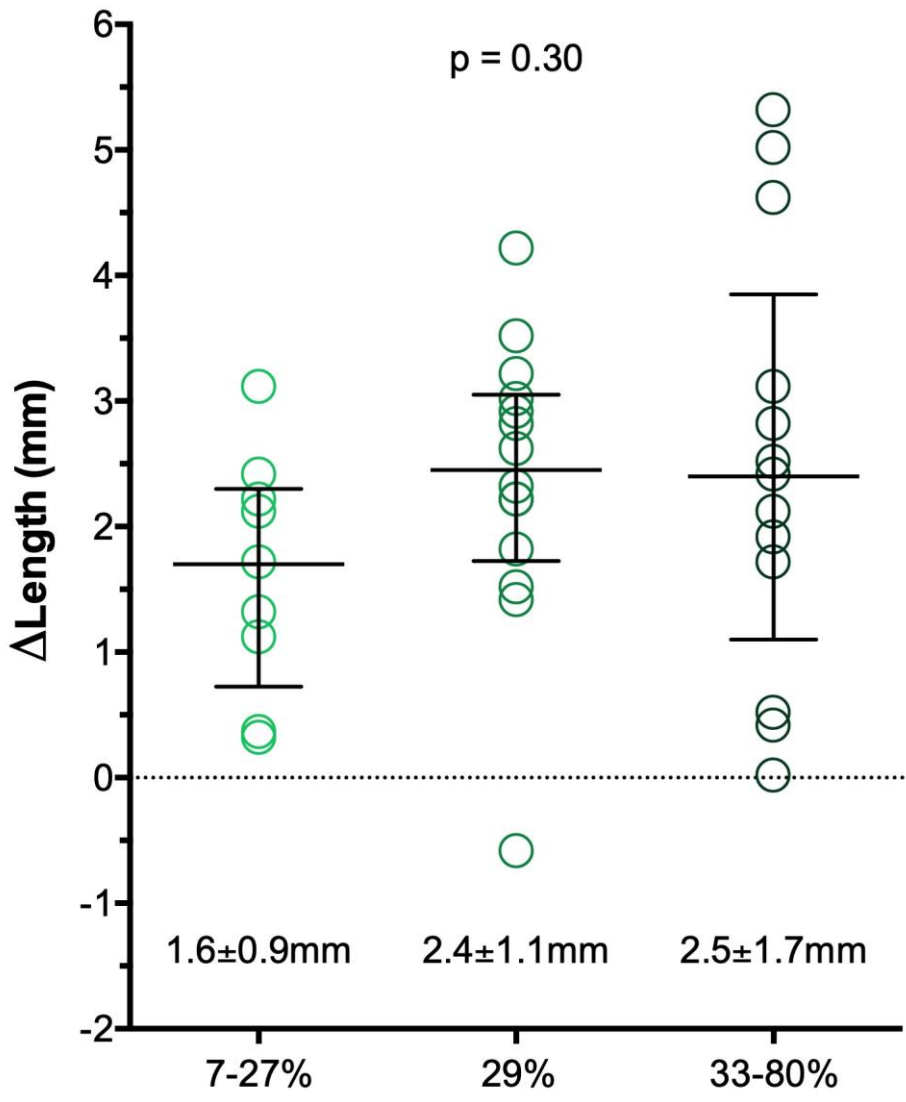

**Tertiles according to relative overexpansion**

**Supplementary Figure 4.** Lengthening in the tertiles according to extent of overdilation.
